# Supplementary material
Source: MDPI journal article supplement (https://www.mdpi.com/2072-4292/9/8/861)
Supplement: s1 [file s1]

## Appendix A

The biogeochemical data was separated into five preliminary classes according to the concentration of total suspended solids (TSS) aiming to facilitate the interpretation of the results. The definition of classes was based on prior knowledge of the level of mining impact on the sampled rivers and statistical tests for significant differences on TSS (non-parametric Mann-Whitney U Tests;  $p < 0.10$ ). The non-parametric test confirmed the significant TSS difference among the five classes previously defined.

| Mann-Whitney U Test<br>for TSS concentration |              |              |                  |                  |      |        |         |
|----------------------------------------------|--------------|--------------|------------------|------------------|------|--------|---------|
| Marked tests are significant at $p < 0.10$   |              |              |                  |                  |      |        |         |
|                                              | Valid N      | Valid N      | Rank Sum         | Rank Sum         | U    | Z      | p-value |
| Class 1 vs Class 2                           | class1<br>16 | class2<br>17 | class1<br>136.00 | class2<br>425.00 | 0.00 | -4.881 | 0.000   |
| Class 2 vs Class 3                           | class2<br>17 | class3<br>2  | class2<br>153.00 | class3<br>37.00  | 0.00 | -2.192 | 0.028   |
| Class 3 vs Class 4                           | class3<br>2  | class4<br>3  | class3<br>3.00   | class4<br>12.00  | 0.00 | -1.443 | 0.096   |
| Class 4 vs Class 5                           | class4<br>3  | class5<br>3  | class4<br>6.00   | class5<br>15.00  | 0.00 | -1.746 | 0.081   |
